# Supplementary material for: Surveillance of Salmonella enterica serovar Typhi in Colombia, 2012–2015
Source: PLoS Negl Trop Dis. 2020 Mar 10;14(3):e0008040. doi: 10.1371/journal.pntd.0008040 (PMC7083327; doi:10.1371/journal.pntd.0008040)
Supplement: S2 Table — (XLSX) [file pntd.0008040.s003.xlsx]

## Sheet: copia 1  
Table S2. Patient and isolate data
Public ID	Patient data											Isolate details and metadata
	YEAR	AGE GROUPS	AGE (YEARS)	SEX	AREA	Residence Location (Departments)	Residence Location (City/Region)	Regime type health coverage	Ethnic background	Hospitalized patient	Outcome	Location (Departments)	Sample	Antimicrobial susceptibility profile	PATRON COIN PFGE
1	2012	1 to 9 years	2	Male	Municipal center	Chocó	Quibdó	Subsidized	Others	Yes	Live	Antioquia	Stool	SXT(R)	COIN12JPPX01.0008
2	2012	1 to 9 years	4	Male	Municipal center	Atlántico	Barranquilla	Contributory	Others	Yes	Live	Atlántico	Blood	sensitive	COIN12JPPX01.0032
3	2012	1 to 9 years	5	Female	Municipal center	Norte de Santander	Chinácota	Contributory	Others	Yes	Live	Norte de Santander	Blood	sensitive	COIN12JPPX01.0115
4	2012	1 to 9 years	5	Female	Municipal center	Meta	Granada	Subsidized	Others	No	Live	Meta	Blood	sensitive	COIN12JPPX01.0176
5	2012	1 to 9 years	5	Male	Scattered rural	Meta	Granada	Contributory	Others	Yes	Live	Meta	Blood	sensitive	COIN12JPPX01.0025
6	2012	1 to 9 years	5	Female	Scattered rural	Cundinamarca	Sopó	Contributory	Others	Yes	Live	Cundinamarca	Stool	sensitive	COIN12JPPX01.0058
7	2012	1 to 9 years	7	Male	Populated Center	Cauca	Guapi	Exception	Others	Yes	Live	Valle del Cauca	Stool	sensitive	COIN12JPPX01.0195
8	2012	1 to 9 years	8	Female	Municipal center	Norte de Santander	Cúcuta	Contributory	Others	Yes	Live	Norte de Santander	Blood	sensitive	COIN12JPPX01.0115
9	2012	10 to 19 years	10	Female	Municipal center	Atlántico	Barranquilla	Subsidized	Others	Yes	Live	Atlántico	Blood	sensitive	COIN12JPPX01.0240
10	2012	10 to 19 years	10	Female	Municipal center	Cauca	Puerto Tejada	Subsidized	Others	Yes	Live	Cauca	Blood	sensitive	COIN12JPPX01.0194
11	2012	10 to 19 years	11	Male	Municipal center	Córdoba	Montería	Contributory	Others	Yes	Live	Antioquia	Blood	NAL(R)-CIP(R)	COIN12JPPX01.0221
12	2012	10 to 19 years	11	Male	Populated Center	Bolívar	Turbaco	No affiliation	Others	Yes	Live	Bolivar	Blood	sensitive	COIN12JPPX01.0188
13	2012	10 to 19 years	12	Male	Municipal center	Norte de Santander	Cúcuta	Subsidized	Others	Yes	Live	Norte de Santander	Blood	sensitive	COIN12JPPX01.0115
14	2012	10 to 19 years	14	Female	Municipal center	Huila	Garzón	Subsidized	Others	Yes	Live	Huila	Blood	sensitive	COIN12JPPX01.0040
15	2012	10 to 19 years	14	Female	Scattered rural	Norte de Santander	Cúcuta	Subsidized	Others	Yes	Live	Norte de Santander	Blood	NAL(I)-CIP(I)	COIN12JPPX01.0135
16	2012	10 to 19 years	15	Female	Municipal center	Chocó	Quibdó	Subsidized	Others	Yes	Live	Antioquia	Blood	sensitive	COIN12JPPX01.0070
17	2012	10 to 19 years	16	Male	Municipal center	Huila	Garzón	Subsidized	Others	Yes	Live	Huila	Blood	sensitive	COIN12JPPX01.0155
18	2012	10 to 19 years	16	Female	Scattered rural	Huila	Garzón	Subsidized	Others	Yes	Live	Huila	Blood	sensitive	COIN12JPPX01.0238
19	2012	10 to 19 years	17	Male	Municipal center	Norte de Santander	Cúcuta	Contributory	Others	Yes	Live	Norte de Santander	Blood	sensitive	COIN12JPPX01.0115
20	2012	10 to 19 years	19	Male	Municipal center	Valle del Cauca	Cali	Especial	Others	No	Live	Valle del Cauca	Blood	sensitive	COIN12JPPX01.0003
21	2012	20 to 29 years	20	Female	Municipal center	Norte de Santander	Cúcuta	Contributory	Others	Yes	Live	Norte de Santander	Blood	TE(R)	COIN12JPPX01.0115
22	2012	20 to 29 years	20	Female	Municipal center	Norte de Santander	Cúcuta	Contributory	Others	Yes	Live	Santander	Blood	sensitive	COIN12JPPX01.0187
23	2012	20 to 29 years	20	Male	Municipal center	Norte de Santander	Cúcuta	Contributory	Others	No	Live	Norte de Santander	Blood	sensitive	COIN12JPPX01.0047
24	2012	20 to 29 years	20	Male	Municipal center	Valle del Cauca	Cali	Contributory	Others	No	Live	Valle del Cauca	Blood	sensitive	COIN12JPPX01.0003
25	2012	20 to 29 years	20	Male	Municipal center	Norte de Santander	Cúcuta	No affiliation	Others	Yes	Live	Norte de Santander	Blood	sensitive	COIN12JPPX01.0213
26	2012	20 to 29 years	20	Male	Municipal center	Antioquia		No affiliation	Others	Yes	Live	Antioquia	Stool	NAL(R)	COIN12JPPX01.0230
27	2012	20 to 29 years	20	Male	Scattered rural	Huila	Agrado	Subsidized	Others	Yes	Live	Huila	Blood	sensitive	COIN12JPPX01.0023
28	2012	20 to 29 years	21	Male	Municipal center	Norte de Santander	Cúcuta	Contributory	Others	Yes	Live	Norte de Santander	Blood	sensitive	COIN12JPPX01.0115
29	2012	20 to 29 years	21	Male	Municipal center	Cundinamarca	Zipaquirá	No affiliation	Others	No	Live	Cundinamarca	Blood	sensitive	COIN12JPPX01.0198
30	2012	20 to 29 years	21	Male	Scattered rural	Bogotá, D.C.	Bogotá, D.C.	Especial	Others	Yes	Live	Bogotá	Blood	sensitive	COIN12JPPX01.0023
31	2012	20 to 29 years	23	Female	Municipal center	Huila	Garzón	Contributory	Others	Yes	Live	Huila	Blood	sensitive	COIN12JPPX01.0023
32	2012	20 to 29 years	23	Female	Municipal center	Norte de Santander	Los Patios	Contributory	Others	No	Live	Norte de Santander	Blood	sensitive	COIN12JPPX01.0047
33	2012	20 to 29 years	23	Male	Municipal center	Huila	Garzón	Contributory	Others	Yes	Live	Huila	Blood	sensitive	COIN12JPPX01.0155
34	2012	20 to 29 years	24	Male	Populated Center	Norte de Santander	Tibú	Contributory	Others	Yes	Live	Norte de Santander	Stool	sensitive	COIN12JPPX01.0115
35	2012	20 to 29 years	24	Male	Populated Center	Valle del Cauca	Cali	Especial	Others	No	Live	Valle del Cauca	Blood	sensitive	COIN12JPPX01.0126
36	2012	20 to 29 years	25	Male	Municipal center	Norte de Santander	Cúcuta	Contributory	Others	Yes	Live	Norte de Santander	Blood	sensitive	COIN12JPPX01.0115
37	2012	20 to 29 years	25	Male	Municipal center	Norte de Santander	Cúcuta	Contributory	Others	Yes	Live	Santander	Blood	sensitive	COIN12JPPX01.0183
38	2012	20 to 29 years	26	Male	Municipal center	Atlántico	Soledad	Contributory	Others	Yes	Live	Atlántico	Blood	sensitive	COIN15JPPX01.0240
39	2012	20 to 29 years	26	Male	Municipal center	Huila	Gigante	Contributory	Others	Yes	Live	Huila	Blood	sensitive	COIN12JPPX01.0155
40	2012	20 to 29 years	26	Male	Municipal center	Norte de Santander	Salazar	Contributory	Others	Yes	Live	Norte de Santander	Blood	sensitive	COIN12JPPX01.0115
41	2012	20 to 29 years	26	Female	Municipal center	Norte de Santander	Cúcuta	Contributory	Others	Yes	Live	Norte de Santander	Stool	sensitive	COIN12JPPX01.0115
42	2012	20 to 29 years	27	Male	Municipal center	Norte de Santander	Cúcuta	Contributory	Others	No	Live	Norte de Santander	Blood	sensitive	COIN12JPPX01.0115
43	2012	20 to 29 years	27	Female	Municipal center	Meta	Granada	Especial	Others	No	Live	Meta	Blood	sensitive	COIN12JPPX01.0058
44	2012	20 to 29 years	29	Male	Populated Center	Cundinamarca	Fusagasugá	Exception	Others	Yes	Live	Bogotá	Blood	sensitive	COIN12JPPX01.0058
45	2012	30 to 39 years	30	Female	Municipal center	Norte de Santander	Cúcuta	Exception	Others	Yes	Live	Norte de Santander	Blood	sensitive	COIN12JPPX01.0187
46	2012	30 to 39 years	30	Male	Scattered rural	Norte de Santander		Contributory	Others	Yes	Live	Norte de Santander	Blood	NAL(I)	COIN12JPPX01.0074
47	2012	30 to 39 years	31	Male	Municipal center	Norte de Santander	Cúcuta	Contributory	Others	Yes	Live	Norte de Santander	Blood	sensitive	COIN12JPPX01.0196
48	2012	30 to 39 years	32	Male	Municipal center	Norte de Santander	Cúcuta	Contributory	Others	No	Live	Norte de Santander	Blood	sensitive	COIN12JPPX01.0008
49	2012	30 to 39 years	32	Female	Municipal center	Norte de Santander	Cúcuta	Contributory	Others	Yes	Live	Norte de Santander	Stool	sensitive	COIN12JPPX01.0115
50	2012	30 to 39 years	33	Female	Municipal center	Huila	Garzón	Subsidized	Others	Yes	Live	Huila	Blood	sensitive	COIN12JPPX01.0155
51	2012	30 to 39 years	33	Male	Municipal center	Norte de Santander	Cúcuta	Subsidized	Others	Yes	Live	Norte de Santander	Stool	sensitive	COIN12JPPX01.0115
52	2012	30 to 39 years	34	Male	Municipal center	Norte de Santander	Cúcuta	Contributory	Others	Yes	Live	Norte de Santander	Blood	sensitive	COIN12JPPX01.0115
53	2012	30 to 39 years	34	Female	Municipal center	Valle del Cauca	Cali	No affiliation	Others	No	Live	Norte de Santander	Blood	sensitive	COIN12JPPX01.0115
54	2012	30 to 39 years	36	Male	Municipal center	Norte de Santander	Cúcuta	Contributory	Others	Yes	Live	Norte de Santander	Blood	TE(R)	COIN12JPPX01.0115
55	2012	30 to 39 years	36	Male	Municipal center	Norte de Santander	Villa del Rosario	No affiliation	Others	Yes	Live	Norte de Santander	Stool	NAL(I)-CIP(I)	COIN12JPPX01.0074
56	2012	30 to 39 years	39	Male	Municipal center	Norte de Santander	Villa del Rosario	No affiliation	Others	Yes	Live	Norte de Santander	Blood	sensitive	COIN12JPPX01.0115
57	2012	40 to 49 years	41	Male	Scattered rural	Bogotá, D.C.	Bogotá, D.C.	Contributory	Others	Yes	Live	Bogotá	NA	sensitive	COIN12JPPX01.0155
58	2012	40 to 49 years	43	Male	Municipal center	Norte de Santander	Los Patios	Contributory	Others	Yes	Live	Norte de Santander	Blood	sensitive	COIN12JPPX01.0187
59	2012	40 to 49 years	44	Male	Scattered rural	Huila	Garzón	Subsidized	Others	Yes	Live	Huila	Blood	sensitive	COIN12JPPX01.0173
60	2012	40 to 49 years	46	Female	Municipal center	Norte de Santander	Cúcuta	Contributory	Others	Yes	Live	Norte de Santander	Blood	sensitive	COIN12JPPX01.0115
61	2012	40 to 49 years	47	Male	Scattered rural	Huila	Garzón	Subsidized	Others	Yes	Live	Huila	Blood	sensitive	COIN12JPPX01.0155
62	2012	40 to 49 years	49	Male	Municipal center	Norte de Santander	Cúcuta	Subsidized	Others	Yes	Live	Norte de Santander	Blood	sensitive	COIN12JPPX01.0115
63	2012	>50 years	50	Male	Municipal center	Norte de Santander	Cúcuta	Subsidized	Others	Yes	Live	Norte de Santander	Blood	NAL(I)-CIP(I)	COIN12JPPX01.0075
64	2012	>50 years	53	Male	Municipal center	Bogotá, D.C.	Bogotá, D.C.	Contributory	Others	Yes	Live	Bogotá	Blood	TE(R)-C(R)-AMC(R)	COIN12JPPX01.0199
65	2012	>50 years	63	Male	Municipal center	Meta	Granada	Subsidized	Others	No	Live	Meta	Blood	sensitive	COIN12JPPX01.0058
66	2012	>50 years	65	Male	Municipal center	Antioquia	Medellín	No affiliation	Others	No	Live	Antioquia	Liquid corporal-secretions	sensitive	COIN12JPPX01.0059
67	2013	1 to 9 years	2	Male	Municipal center	Meta	Granada	Contributory	Others	Yes	Live	Meta	Blood	sensitive	COIN13JPPX01.0032
68	2013	1 to 9 years	3	Male	Municipal center	Norte de Santander	Cúcuta	Subsidized	Afro-Colombian	Yes	Live	Norte de Santander	Blood	sensitive	COIN13JPPX01.0115
69	2013	1 to 9 years	5	Male	Municipal center	Norte de Santander	Los Patios	Contributory	Others	Yes	Live	Norte de Santander	Blood	sensitive	COIN13JPPX01.0115
70	2013	1 to 9 years	6	Female	Municipal center	Meta	Granada	Subsidized	Others	Yes	Live	Meta	Blood	sensitive	COIN13JPPX01.0101
71	2013	1 to 9 years	6	Female	Populated Center	Chocó	Quibdó	Subsidized	Others	Yes	Live	Antioquia	Liquid corporal-secretions	sensitive	COIN13JPPX01.0054
72	2013	1 to 9 years	7	Female	Municipal center	Norte de Santander	Cúcuta	Contributory	Others	Yes	Live	Santander	Blood	sensitive	COIN13JPPX01.0115
73	2013	1 to 9 years	7	Male	Municipal center	Valle del Cauca	Cali	Contributory	Others	Yes	Live	Valle del Cauca	Blood	sensitive	COIN13JPPX01.0013
74	2013	1 to 9 years	8	Female	Municipal center	Norte de Santander	Cúcuta	Contributory	Others	Yes	Live	Norte de Santander	Blood	sensitive	COIN13JPPX01.0115
75	2013	10 to 19 years	10	Male	Municipal center	Norte de Santander	Cúcuta	Contributory	Others	No	Live	Norte de Santander	Blood	sensitive	COIN13JPPX01.0115
76	2013	10 to 19 years	10	Female	Municipal center	Santander	Bucaramanga	Subsidized	Others	Yes	Live	Santander	Blood	sensitive	COIN13JPPX01.0146
77	2013	10 to 19 years	10	Female	Scattered rural	Antioquia	Apartadó	Contributory	Others	Yes	Live	Antioquia	Blood	sensitive	COIN13JPPX01.0008
78	2013	10 to 19 years	11	Female	Municipal center	Norte de Santander	Cúcuta	Contributory	Others	Yes	Live	Norte de Santander	Blood	sensitive	COIN13JPPX01.0162
79	2013	10 to 19 years	11	Male	Municipal center	Norte de Santander	Villa del Rosario	Contributory	Others	Yes	Live	Norte de Santander	Blood	sensitive	COIN13JPPX01.0115
80	2013	10 to 19 years	11	Male	Municipal center	Norte de Santander	Cúcuta	Contributory	Others	Yes	Live	Norte de Santander	Blood	sensitive	COIN13JPPX01.0115
81	2013	10 to 19 years	12	Male	Populated Center	Risaralda	Pereira	Subsidized	Others	No	Live	Risaralda	Blood	sensitive	COIN13JPPX01.0008
82	2013	10 to 19 years	12	Male	Scattered rural	Huila	Garzón	No affiliation	Others	Yes	Live	Huila	Blood	sensitive	COIN13JPPX01.0174
83	2013	10 to 19 years	13	Male	Municipal center	Norte de Santander	Cúcuta	Contributory	Others	Yes	Live	Norte de Santander	Blood	sensitive	COIN13JPPX01.0115
84	2013	10 to 19 years	13	Female	Municipal center	Meta	Granada	Subsidized	Others	Yes	Live	Meta	Blood	sensitive	COIN13JPPX01.0062
85	2013	10 to 19 years	14	Male	Municipal center	Norte de Santander	Cúcuta	Subsidized	Others	Yes	Live	Norte de Santander	Stool	sensitive	COIN13JPPX01.0201
86	2013	10 to 19 years	14	Female	Scattered rural	Antioquia	Carepa	Contributory	Others	Yes	Live	Antioquia	Blood	sensitive	COIN13JPPX01.0009
87	2013	10 to 19 years	15	Female	Municipal center	Norte de Santander	Cúcuta	Contributory	Others	Yes	Live	Norte de Santander	Blood	CIP(I)	COIN13JPPX01.0183
88	2013	10 to 19 years	15	Male	Municipal center	Atlántico	Barranquilla	Contributory	Others	Yes	Live	Atlántico	Blood	sensitive	COIN13JPPX01.0185
89	2013	10 to 19 years	15	Male	Municipal center	Huila	Garzón	Contributory	Others	Yes	Live	Huila	Stool	NAL(R)	COIN13JPPX01.0106
90	2013	10 to 19 years	15	Male	Scattered rural	Huila	Tarqui	Subsidized	Others	Yes	Live	Huila	Stool	sensitive	COIN13JPPX01.0004
91	2013	10 to 19 years	16	Female	Municipal center	Norte de Santander	Cúcuta	Contributory	Others	Yes	Live	Norte de Santander	Blood	sensitive	COIN13JPPX01.0115
92	2013	10 to 19 years	16	Female	Municipal center	Meta	Granada	Subsidized	Others	No	Live	Meta	Blood	sensitive	COIN13JPPX01.0058
93	2013	10 to 19 years	16	Male	Municipal center	Norte de Santander	Cúcuta	Subsidized	Others	Yes	Live	Norte de Santander	Blood	sensitive	COIN13JPPX01.0115
94	2013	10 to 19 years	17	Male	Municipal center	Norte de Santander	Cúcuta	Contributory	Others	No	Live	Norte de Santander	Blood	sensitive	COIN13JPPX01.0115
95	2013	10 to 19 years	18	Male	Municipal center	Norte de Santander	Cúcuta	Contributory	Others	No	Live	Norte de Santander	Blood	sensitive	COIN13JPPX01.0115
96	2013	10 to 19 years	19	Male	Populated Center	Cauca	Guapi	Exception	Others	Yes	Live	Valle del Cauca	Blood	sensitive	COIN13JPPX01.0175
97	2013	20 to 29 years	20	Male	Municipal center	Norte de Santander	Cúcuta	No affiliation	Afro-Colombian	Yes	Live	Norte de Santander	Blood	sensitive	COIN13JPPX01.0138
98	2013	20 to 29 years	20	Male	Municipal center	Norte de Santander	Los Patios	Contributory	Others	Yes	Live	Norte de Santander	Blood	sensitive	COIN13JPPX01.0115
99	2013	20 to 29 years	20	Male	Municipal center	Norte de Santander	Villa del Rosario	Exception	Others	Yes	Live	Norte de Santander	Blood	TE(R)	COIN13JPPX01.0214
100	2013	20 to 29 years	20	Male	Populated Center	Cundinamarca	Soacha	Subsidized	Others	Yes	Live	Bogotá	Blood	sensitive	COIN13JPPX01.0183
101	2013	20 to 29 years	21	Female	Municipal center	Norte de Santander	Cúcuta	Contributory	Others	Yes	Live	Norte de Santander	Blood	sensitive	COIN13JPPX01.0115
102	2013	20 to 29 years	21	Female	Municipal center	Norte de Santander	Cúcuta	Contributory	Others	Yes	Live	Norte de Santander	Blood	sensitive	COIN13JPPX01.0083
103	2013	20 to 29 years	21	Male	Municipal center	Norte de Santander	Cúcuta	Contributory	Others	Yes	Live	Norte de Santander	Blood	sensitive	COIN13JPPX01.0178
104	2013	20 to 29 years	21	Male	Municipal center	Norte de Santander	Cúcuta	Contributory	Others	Yes	Live	Norte de Santander	Blood	sensitive	COIN13JPPX01.0115
105	2013	20 to 29 years	21	Male	Municipal center	Norte de Santander	Cúcuta	No affiliation	Others	Yes	Live	Norte de Santander	Blood	sensitive	COIN13JPPX01.0115
106	2013	20 to 29 years	22	Female	Municipal center	Norte de Santander	Los Patios	Contributory	Others	Yes	Live	Norte de Santander	Blood	sensitive	COIN13JPPX01.0115
107	2013	20 to 29 years	22	Male	Municipal center	Norte de Santander	Cúcuta	Contributory	Others	Yes	Live	Norte de Santander	Blood	sensitive	COIN13JPPX01.0115
108	2013	20 to 29 years	22	Male	Municipal center	Norte de Santander	San Cayetano	Contributory	Others	Yes	Live	Norte de Santander	Blood	sensitive	COIN13JPPX01.0007
109	2013	20 to 29 years	22	Male	Municipal center	Norte de Santander	Cúcuta	Contributory	Others	No	Live	Norte de Santander	Blood	sensitive	COIN13JPPX01.0083
110	2013	20 to 29 years	22	Female	Municipal center	Bogotá, D.C.	Bogotá, D.C.	Subsidized	Others	Yes	Live	Bogotá	Blood	sensitive	COIN13JPPX01.0032
111	2013	20 to 29 years	22	Female	Scattered rural	Norte de Santander		No affiliation	Afro-Colombian	Yes	Live	Norte de Santander	Blood	sensitive	COIN13JPPX01.0115
112	2013	20 to 29 years	23	Male	Municipal center	Antioquia	Medellín	Contributory	Others	Yes	Live	Antioquia	Blood	sensitive	COIN13JPPX01.0215
113	2013	20 to 29 years	24	Female	Municipal center	Norte de Santander	Cúcuta	Contributory	Others	No	Live	Norte de Santander	Blood	sensitive	COIN13JPPX01.0115
114	2013	20 to 29 years	25	Male	Municipal center	Norte de Santander	Cúcuta	Contributory	Others	No	Live	Norte de Santander	Blood	sensitive	COIN13JPPX01.0115
115	2013	20 to 29 years	26	Female	Municipal center	Norte de Santander	Cúcuta	Contributory	Others	No	Live	Norte de Santander	Blood	sensitive	COIN13JPPX01.0115
116	2013	20 to 29 years	26	Female	Municipal center	Norte de Santander	Cúcuta	Contributory	Others	Yes	Live	Norte de Santander	Blood	sensitive	COIN13JPPX01.0115
117	2013	20 to 29 years	26	Male	Municipal center	Norte de Santander	Cúcuta	Contributory	Others	No	Live	Norte de Santander	Blood	sensitive	COIN13JPPX01.0115
118	2013	20 to 29 years	26	Male	Municipal center	Norte de Santander	Cúcuta	Contributory	Others	Yes	Live	Norte de Santander	Blood	sensitive	COIN13JPPX01.0115
119	2013	20 to 29 years	26	Female	Municipal center	Norte de Santander	Cúcuta	Contributory	Others	Yes	Live	Norte de Santander	Stool	sensitive	COIN13JPPX01.0123
120	2013	20 to 29 years	26	Male	Populated Center	Norte de Santander	Tibú	Contributory	Others	Yes	Live	Norte de Santander	Blood	sensitive	COIN13JPPX01.0178
121	2013	20 to 29 years	27	Male	Municipal center	Norte de Santander	Cúcuta	Contributory	Others	Yes	Live	Norte de Santander	Blood	sensitive	COIN13JPPX01.0115
122	2013	20 to 29 years	27	Male	Scattered rural	Antioquia	Apartadó	Subsidized	Others	Yes	Live	Antioquia	Blood	sensitive	COIN13JPPX01.0178
123	2013	20 to 29 years	28	Female	Municipal center	Norte de Santander	Los Patios	Contributory	Others	No	Live	Norte de Santander	Blood	sensitive	COIN13JPPX01.0183
124	2013	20 to 29 years	28	Male	Municipal center	Norte de Santander	Cúcuta	Contributory	Others	Yes	Live	Norte de Santander	Blood	sensitive	COIN13JPPX01.0115
125	2013	20 to 29 years	28	Female	Municipal center	Antioquia	Chigorodó	Contributory	Others	Yes	Live	Antioquia	Blood-Stool	sensitive	COIN13JPPX01.0067
126	2013	20 to 29 years	29	Male	Municipal center	Norte de Santander	Cúcuta	Contributory	Others	No	Live	Norte de Santander	Blood	sensitive	COIN13JPPX01.0115
127	2013	20 to 29 years	29	Male	Municipal center	Norte de Santander	Los Patios	Contributory	Others	Yes	Live	Santander	Blood	sensitive	COIN13JPPX01.0115
128	2013	20 to 29 years	29	Male	Municipal center	Antioquia	Apartadó	No affiliation	Others	Yes	Live	Antioquia	Blood	sensitive	COIN13JPPX01.0009
129	2013	30 to 39 years	30	Female	Municipal center	Norte de Santander	Cúcuta	Contributory	Others	Yes	Live	Norte de Santander	Blood-Stool	sensitive	COIN13JPPX01.0115
130	2013	30 to 39 years	31	Male	Municipal center	Norte de Santander	Cúcuta	Contributory	Others	Yes	Live	Santander	Blood	sensitive	COIN13JPPX01.0115
131	2013	30 to 39 years	31	Male	Municipal center	Norte de Santander	Cúcuta	No affiliation	Others	Yes	Live	Norte de Santander	Blood	sensitive	COIN13JPPX01.0115
132	2013	30 to 39 years	32	Male	Municipal center	Norte de Santander	El Zulia	No affiliation	Others	No	Live	Norte de Santander	Blood	sensitive	COIN13JPPX01.0187
133	2013	30 to 39 years	34	Female	Municipal center	Bogotá, D.C.	Bogotá, D.C.	Contributory	Others	Yes	Live	Bogotá	Blood	sensitive	COIN13JPPX01.0115
134	2013	30 to 39 years	34	Male	Scattered rural	Cauca	Villa Rica	Subsidized	Afro-Colombian	Yes	Live	Valle del Cauca	Blood	sensitive	COIN13JPPX01.0013
135	2013	30 to 39 years	35	Male	Municipal center	Norte de Santander	Los Patios	Contributory	Others	No	Live	Norte de Santander	Blood	sensitive	COIN13JPPX01.0115
136	2013	30 to 39 years	35	Male	Municipal center	Huila	Garzón	Subsidized	Others	Yes	Live	Huila	Blood	sensitive	COIN13JPPX01.0174
137	2013	30 to 39 years	36	Male	Populated Center	Bolívar	Villanueva	Subsidized	Afro-Colombian	Yes	Live	Bolivar	Blood	NAL(R)	COIN13JPPX01.0127
138	2013	30 to 39 years	37	Male	Municipal center	Norte de Santander	El Zulia	Contributory	Others	No	Live	Norte de Santander	Blood	AMP(I)	COIN13JPPX01.0083
139	2013	30 to 39 years	37	Female	Municipal center	Antioquia	Medellín	No affiliation	Others	Yes	Live	Antioquia	Blood	sensitive	COIN13JPPX01.0104
140	2013	30 to 39 years	38	Male	Municipal center	Norte de Santander	Cúcuta	No affiliation	Others	Yes	Live	Norte de Santander	Blood	sensitive	COIN13JPPX01.0115
141	2013	30 to 39 years	38	Female	Populated Center	Bogotá, D.C.	Bogotá, D.C.	Contributory	Others	Yes	Live	Bogotá	Blood	sensitive	COIN13JPPX01.0032
142	2013	30 to 39 years	39	Male	Municipal center	Boyacá	Tunja	Subsidized	Others	Yes	Live	Boyacá	Blood	sensitive	COIN13JPPX01.0107
143	2013	40 to 49 years	40	Female	Municipal center	Norte de Santander	Cúcuta	Contributory	Others	Yes	Live	Norte de Santander	Blood	sensitive	COIN13JPPX01.0115
144	2013	40 to 49 years	40	Male	Municipal center	Norte de Santander	Villa del Rosario	Subsidized	Others	No	Live	Norte de Santander	Blood	sensitive	COIN13JPPX01.0217
145	2013	40 to 49 years	41	Male	Municipal center	Norte de Santander	Cúcuta	Contributory	Others	No	Live	Norte de Santander	Blood	sensitive	COIN13JPPX01.0115
146	2013	40 to 49 years	41	Male	Municipal center	Norte de Santander	Cúcuta	Contributory	Others	Yes	Live	Norte de Santander	Blood	sensitive	COIN13JPPX01.0115
147	2013	40 to 49 years	41	Female	Municipal center	Meta	Granada	Subsidized	Others	Yes	Live	Meta	Blood	sensitive	COIN13JPPX01.0200
148	2013	40 to 49 years	42	Female	Municipal center	Meta	Granada	Subsidized	Others	Yes	Live	Meta	Blood	sensitive	COIN13JPPX01.0032
149	2013	40 to 49 years	44	Female	Municipal center	Norte de Santander	Los Patios	Contributory	Others	No	Live	Norte de Santander	Blood	sensitive	COIN13JPPX01.0177
150	2013	40 to 49 years	45	Male	Municipal center	Meta	Granada	Contributory	Others	Yes	Live	Meta	Blood	sensitive	COIN13JPPX01.0032
151	2013	>50 years	52	Female	Municipal center	Bogotá, D.C.	Bogotá, D.C.	Contributory	Others	Yes	Live	Bogotá	NA	sensitive	COIN13JPPX01.0018
152	2013	>50 years	54	Female	Scattered rural	Meta	Mesetas	Subsidized	Others	Yes	Live	Meta	Blood	sensitive	COIN13JPPX01.0058
153	2013	>50 years	58	Female	Municipal center	Bogotá, D.C.	Bogotá, D.C.	Contributory	Others	Yes	Live	Bogotá	Blood	sensitive	COIN13JPPX01.0028
154	2014	1 to 9 years	1	Male	Municipal center	Meta	Granada	Contributory	Others	Yes	Live	Meta	NA	sensitive	COIN14JPPX01.0032
155	2014	1 to 9 years	1	Female	Scattered rural	Antioquia	Apartadó	Subsidized	Others	Yes	Live	Antioquia	Blood	sensitive	COIN14JPPX01.0102
156	2014	1 to 9 years	1	Female	Scattered rural	Antioquia	Apartadó	Subsidized	Others	Yes	Live	Antioquia	Blood	sensitive	COIN14JPPX01.0008
157	2014	1 to 9 years	2	Female	Municipal center	Norte de Santander	Cúcuta	Contributory	Others	Yes	Live	Norte de Santander	Blood	sensitive	COIN14JPPX01.0083
158	2014	1 to 9 years	2	Female	Municipal center	Bogotá, D.C.	Bogotá, D.C.	Subsidized	Others	Yes	Live	Bogotá	Blood	sensitive	COIN14JPPX01.0115
159	2014	1 to 9 years	2	Male	Municipal center	Chocó	Riosucio	Subsidized	Others	Yes	Live	Antioquia	Blood	sensitive	COIN14JPPX01.0115
160	2014	1 to 9 years	2	Male	Scattered rural	Antioquia	Apartadó	Subsidized	Others	Yes	Live	Antioquia	Blood	sensitive	COIN14JPPX01.0115
161	2014	1 to 9 years	3	Female	Municipal center	Norte de Santander	Cúcuta	Contributory	Others	Yes	Live	Norte de Santander	Stool	NAL(R)-CIP(I)	COIN14JPPX01.0187
162	2014	1 to 9 years	5	Female	Municipal center	Norte de Santander	Ocaña	Contributory	Others	Yes	Live	Norte de Santander	Blood	sensitive	COIN14JPPX01.0202
163	2014	1 to 9 years	5	Male	Municipal center	Meta	Granada	No affiliation	Others	Yes	Live	Meta	Blood	sensitive	COIN14JPPX01.0062
164	2014	1 to 9 years	6	Female	Municipal center	Meta	Granada	Subsidized	Others	Yes	Live	Meta	Blood	sensitive	COIN14JPPX01.0062
165	2014	1 to 9 years	6	Male	Municipal center	Meta	Granada	Subsidized	Others	Yes	Live	Meta	Blood	sensitive	COIN14JPPX01.0187
166	2014	1 to 9 years	6	Male	Scattered rural	Chocó	Istmina	Subsidized	Afro-Colombian	Yes	Live	Antioquia	Bone marrow	TE(R)-NAL(I)-AMC(I)-SXT(R)-AMP(R)	COIN14JPPX01.0183
167	2014	1 to 9 years	7	Male	Municipal center	Norte de Santander	Cúcuta	Contributory	Others	Yes	Live	Norte de Santander	Blood	sensitive	COIN14JPPX01.0187
168	2014	1 to 9 years	7	Male	Scattered rural	Antioquia	Apartadó	Contributory	Others	Yes	Live	Antioquia	Blood	sensitive	COIN14JPPX01.0008
169	2014	1 to 9 years	7	Female	Scattered rural	Antioquia	Apartadó	No affiliation	Others	Yes	Live	Antioquia	Blood	sensitive	COIN14JPPX01.0008
170	2014	1 to 9 years	7	Male	Scattered rural	Antioquia	Apartadó	Subsidized	Others	Yes	Live	Antioquia	Blood	sensitive	COIN14JPPX01.0008
171	2014	1 to 9 years	7	Male	Scattered rural	Antioquia	Apartadó	Subsidized	Others	Yes	Live	Antioquia	Blood	sensitive	COIN14JPPX01.0008
172	2014	1 to 9 years	8	Female	Municipal center	Norte de Santander	Ocaña	Contributory	Others	Yes	Live	Norte de Santander	Blood	sensitive	COIN14JPPX01.0083
173	2014	1 to 9 years	8	Male	Municipal center	Antioquia	Chigorodó	Contributory	Others	Yes	Live	Antioquia	Blood	sensitive	COIN14JPPX01.0211
174	2014	1 to 9 years	8	Female	Scattered rural	Antioquia	Apartadó	No affiliation	Others	Yes	Live	Antioquia	Blood	sensitive	COIN14JPPX01.0012
175	2014	1 to 9 years	8	Male	Scattered rural	Norte de Santander	El Zulia	Subsidized	Others	Yes	Live	Norte de Santander	Blood	sensitive	COIN14JPPX01.0209
176	2014	1 to 9 years	9	Male	Municipal center	Antioquia	Apartadó	Subsidized	Others	No	Live	Antioquia	Blood	sensitive	COIN14JPPX01.0019
177	2014	1 to 9 years	9	Male	Scattered rural	Antioquia	Apartadó	Subsidized	Others	Yes	Live	Antioquia	Blood	sensitive	COIN14JPPX01.0207
178	2014	10 to 19 years	10	Female	Populated Center	Antioquia	Apartadó	Contributory	Others	No	Live	Antioquia	Blood	sensitive	COIN14JPPX01.0008
179	2014	10 to 19 years	10	Male	Populated Center	Bogotá, D.C.	Bogotá, D.C.	Contributory	Others	Yes	Live	Bogotá	Blood	sensitive	COIN14JPPX01.0229
180	2014	10 to 19 years	10	Female	Scattered rural	Antioquia	Apartadó	Subsidized	Others	Yes	Live	Antioquia	Blood	sensitive	COIN14JPPX01.0008
181	2014	10 to 19 years	11	Female	Municipal center	Antioquia	Chigorodó	No affiliation	Others	Yes	Live	Antioquia	Blood	sensitive	COIN14JPPX01.0008
182	2014	10 to 19 years	11	Female	Scattered rural	Antioquia	Apartadó	Subsidized	Others	Yes	Live	Antioquia	Blood	sensitive	COIN14JPPX01.0008
183	2014	10 to 19 years	12	Male	Municipal center	Antioquia	Chigorodó	Subsidized	Others	Yes	Live	Antioquia	Blood	sensitive	COIN14JPPX01.0104
184	2014	10 to 19 years	12	Male	Scattered rural	Antioquia	Apartadó	Contributory	Afro-Colombian	Yes	Death	Antioquia	Blood	sensitive	COIN14JPPX01.0135
185	2014	10 to 19 years	12	Female	Scattered rural	Norte de Santander	Sardinata	Subsidized	Others	Yes	Live	Norte de Santander	Blood	sensitive	COIN14JPPX01.0187
186	2014	10 to 19 years	13	Male	Municipal center	Bogotá, D.C.	Bogotá, D.C.	Contributory	Others	Yes	Live	Bogotá	Blood	sensitive	COIN14JPPX01.0062
187	2014	10 to 19 years	13	Female	Scattered rural	Antioquia	Apartadó	Contributory	Others	Yes	Live	Antioquia	Blood	sensitive	COIN14JPPX01.0008
188	2014	10 to 19 years	13	Male	Scattered rural	Antioquia	Apartadó	Contributory	Others	Yes	Live	Antioquia	Blood	sensitive	COIN14JPPX01.0008
189	2014	10 to 19 years	13	Female	Scattered rural	Antioquia	Apartadó	Subsidized	Others	No	Live	Antioquia	Blood	sensitive	COIN14JPPX01.0008
190	2014	10 to 19 years	14	Female	Populated Center	Huila	Palermo	Subsidized	Others	Yes	Live	Huila	Blood	sensitive	COIN14JPPX01.0225
191	2014	10 to 19 years	14	Female	Scattered rural	Antioquia	Apartadó	Contributory	Others	Yes	Live	Antioquia	Blood	sensitive	COIN14JPPX01.0008
192	2014	10 to 19 years	14	Female	Scattered rural	Antioquia	Apartadó	Subsidized	Others	Yes	Live	Antioquia	Blood	sensitive	COIN14JPPX01.0008
193	2014	10 to 19 years	15	Male	Municipal center	Norte de Santander	Villa del Rosario	Especial	Others	Yes	Live	Norte de Santander	Blood	sensitive	COIN14JPPX01.0115
194	2014	10 to 19 years	16	Male	Scattered rural	Antioquia	Apartadó	Contributory	Others	Yes	Live	Antioquia	Blood	sensitive	COIN14JPPX01.0008
195	2014	10 to 19 years	17	Male	Municipal center	Norte de Santander	Cúcuta	Contributory	Others	Yes	Live	Norte de Santander	Blood	sensitive	COIN14JPPX01.0074
196	2014	10 to 19 years	17	Male	Populated Center	Nariño	Barbacoas	Subsidized	Afro-Colombian	Yes	Live	Nariño	Blood	sensitive	COIN14JPPX01.0192
197	2014	10 to 19 years	17	Female	Populated Center	Antioquia	Apartadó	Contributory	Others	Yes	Live	Antioquia	Blood	TE(R)	COIN14JPPX01.0008
198	2014	10 to 19 years	17	Male	Scattered rural	Antioquia	Murindó	Subsidized	Afro-Colombian	Yes	Live	Antioquia	Blood	sensitive	COIN14JPPX01.0008
199	2014	10 to 19 years	17	Male	Scattered rural	Antioquia	Apartadó	Subsidized	Others	No	Live	Antioquia	Blood	sensitive	COIN14JPPX01.0135
200	2014	10 to 19 years	18	Male	Municipal center	Norte de Santander	Cúcuta	Contributory	Others	Yes	Live	Norte de Santander	Blood-Stool	sensitive	COIN14JPPX01.0187
201	2014	10 to 19 years	18	Male	Municipal center	Huila	Garzón	Exception	Others	Yes	Live	Huila	Blood	sensitive	COIN14JPPX01.0008
202	2014	10 to 19 years	18	Male	Municipal center	Antioquia	Vigía del Fuerte	Subsidized	Others	Yes	Live	Antioquia	Blood	TE(R)	COIN14JPPX01.0008
203	2014	10 to 19 years	18	Male	Scattered rural	Antioquia	Apartadó	Subsidized	Others	Yes	Live	Antioquia	Blood	sensitive	COIN14JPPX01.0008
204	2014	10 to 19 years	19	Male	Scattered rural	Antioquia	Apartadó	Subsidized	Others	Yes	Live	Antioquia	Blood	sensitive	COIN14JPPX01.0226
205	2014	20 to 29 years	20	Female	Municipal center	Norte de Santander	Cúcuta	No affiliation	Others	Yes	Live	Norte de Santander	Blood	sensitive	COIN14JPPX01.0115
206	2014	20 to 29 years	20	Male	Municipal center	Antioquia		Subsidized	Others	No	Live	Antioquia	Blood	sensitive	COIN14JPPX01.0223
207	2014	20 to 29 years	21	Female	Scattered rural	Antioquia	Apartadó	Subsidized	Others	Yes	Live	Antioquia	Blood	sensitive	COIN14JPPX01.0115
208	2014	20 to 29 years	22	Male	Municipal center	Huila	Garzón	Subsidized	Others	Yes	Live	Huila	Blood	sensitive	COIN14JPPX01.0156
209	2014	20 to 29 years	22	Male	Municipal center	Chocó	Quibdó	Subsidized	Others	Yes	Live	Antioquia	Blood	sensitive	COIN14JPPX01.0008
210	2014	20 to 29 years	23	Female	Municipal center	Norte de Santander	Cúcuta	Especial	Others	Yes	Live	Norte de Santander	Blood	sensitive	COIN14JPPX01.0115
211	2014	20 to 29 years	23	Female	Municipal center	Antioquia	Chigorodó	Subsidized	Others	Yes	Live	Antioquia	Blood	sensitive	COIN14JPPX01.0104
212	2014	20 to 29 years	23	Male	Populated Center	Huila		Subsidized	Others	Yes	Live	Huila	Blood	sensitive	COIN14JPPX01.0183
213	2014	20 to 29 years	23	Male	Populated Center	Norte de Santander	Cúcuta	Subsidized	Others	Yes	Live	Norte de Santander	Blood	sensitive	COIN14JPPX01.0115
214	2014	20 to 29 years	23	Male	Scattered rural	Antioquia	Apartadó	Subsidized	Others	Yes	Live	Antioquia	Blood	sensitive	COIN14JPPX01.0008
215	2014	20 to 29 years	24	Female	Municipal center	Antioquia	Apartadó	Contributory	Others	Yes	Live	Antioquia	Blood	sensitive	COIN14JPPX01.0008
216	2014	20 to 29 years	24	Male	Municipal center	Norte de Santander	Villa del Rosario	Contributory	Others	Yes	Live	Norte de Santander	Blood	sensitive	COIN14JPPX01.0115
217	2014	20 to 29 years	24	Male	Municipal center	Norte de Santander	El Zulia	Subsidized	Others	Yes	Live	Norte de Santander	Blood	TE(R)-AMC(I)	COIN14JPPX01.0218
218	2014	20 to 29 years	24	Female	Populated Center	Antioquia	Apartadó	Contributory	Others	Yes	Live	Antioquia	Blood	sensitive	COIN14JPPX01.0008
219	2014	20 to 29 years	25	Female	Municipal center	Antioquia	Medellín	Subsidized	Others	Yes	Live	Antioquia	Stool	sensitive	COIN14JPPX01.0099
220	2014	20 to 29 years	25	Male	Populated Center	Antioquia	Turbo	No affiliation	Others	Yes	Live	Antioquia	Blood	sensitive	COIN14JPPX01.0038
221	2014	20 to 29 years	25	Male	Scattered rural	Antioquia	Apartadó	Contributory	Afro-Colombian	Yes	Live	Antioquia	Blood	sensitive	COIN14JPPX01.0008
222	2014	20 to 29 years	25	Female	Scattered rural	Antioquia	Apartadó	Subsidized	Others	Yes	Live	Antioquia	Blood	sensitive	COIN14JPPX01.0008
223	2014	20 to 29 years	25	Male	Scattered rural	Antioquia	Apartadó	Subsidized	Others	Yes	Live	Antioquia	Blood	sensitive	COIN14JPPX01.0103
224	2014	20 to 29 years	26	Female	Scattered rural	Antioquia	Apartadó	Subsidized	Others	Yes	Live	Antioquia	Blood	sensitive	COIN14JPPX01.0008
225	2014	30 to 39 years	30	Female	Municipal center	Norte de Santander	Cúcuta	Contributory	Others	Yes	Live	Norte de Santander	Blood	sensitive	COIN14JPPX01.0083
226	2014	30 to 39 years	30	Male	Populated Center	Antioquia	Apartadó	Subsidized	Others	Yes	Live	Antioquia	Blood	sensitive	COIN14JPPX01.0008
227	2014	30 to 39 years	31	Male	Municipal center	Bogotá, D.C.	Bogotá, D.C.	Contributory	Others	Yes	Live	Bogotá	Blood	sensitive	COIN14JPPX01.0115
228	2014	30 to 39 years	31	Male	Municipal center	Norte de Santander	Cúcuta	Contributory	Others	Yes	Live	Norte de Santander	Blood	sensitive	COIN14JPPX01.0115
229	2014	30 to 39 years	31	Female	Municipal center	Norte de Santander	Cúcuta	Contributory	Others	Yes	Live	Norte de Santander	Blood	sensitive	COIN14JPPX01.0049
230	2014	30 to 39 years	31	Male	Municipal center	Bogotá, D.C.	Bogotá, D.C.	Contributory	Others	Yes	Live	Bogotá	Stool	sensitive	COIN14JPPX01.0115
231	2014	30 to 39 years	31	Male	Scattered rural	Antioquia	Apartadó	Contributory	Others	No	Live	Antioquia	Blood	sensitive	COIN14JPPX01.0008
232	2014	30 to 39 years	32	Female	Municipal center	Norte de Santander	Cúcuta	Contributory	Others	Yes	Live	Norte de Santander	Blood	sensitive	COIN14JPPX01.0203
233	2014	30 to 39 years	32	Male	Municipal center	Norte de Santander	Cúcuta	No affiliation	Others	Yes	Live	Norte de Santander	Blood	sensitive	COIN14JPPX01.0232
234	2014	30 to 39 years	33	Male	Scattered rural	Antioquia	Apartadó	No affiliation	Others	Yes	Live	Antioquia	Blood	sensitive	COIN14JPPX01.0171
235	2014	30 to 39 years	34	Female	Municipal center	Antioquia	Apartadó	Subsidized	Others	Yes	Live	Antioquia	Blood	sensitive	COIN14JPPX01.0183
236	2014	30 to 39 years	35	Female	Municipal center	Norte de Santander	Cúcuta	Exception	Others	Yes	Live	Norte de Santander	Stool	sensitive	COIN14JPPX01.0115
237	2014	30 to 39 years	36	Male	Populated Center	Antioquia	Apartadó	Contributory	Others	Yes	Live	Antioquia	Blood	sensitive	COIN14JPPX01.0008
238	2014	30 to 39 years	39	Female	Municipal center	Norte de Santander	Cúcuta	Subsidized	Others	Yes	Live	Norte de Santander	Blood	sensitive	COIN14JPPX01.0074
239	2014	30 to 39 years	39	Female	Scattered rural	Antioquia	Apartadó	Subsidized	Others	Yes	Live	Antioquia	Blood	sensitive	COIN14JPPX01.0008
240	2014	40 to 49 years	40	Male	Populated Center	Bogotá, D.C.	Bogotá, D.C.	Subsidized	Others	Yes	Live	Bogotá	Blood	sensitive	COIN14JPPX01.0028
241	2014	40 to 49 years	40	Female	Scattered rural	Antioquia	Apartadó	Subsidized	Others	Yes	Live	Antioquia	Blood	sensitive	COIN14JPPX01.0008
242	2014	40 to 49 years	41	Female	Populated Center	Antioquia	Apartadó	Contributory	Others	Yes	Live	Antioquia	Blood	sensitive	COIN14JPPX01.0008
243	2014	40 to 49 years	42	Male	Scattered rural	Antioquia	Apartadó	No affiliation	Others	Yes	Live	Antioquia	Blood	sensitive	COIN14JPPX01.0008
244	2014	40 to 49 years	43	Male	Municipal center	Norte de Santander	Cúcuta	Subsidized	Others	Yes	Live	Norte de Santander	Blood	sensitive	COIN14JPPX01.0115
245	2014	40 to 49 years	44	Male	Municipal center	Norte de Santander	Villa del Rosario	No affiliation	Others	Yes	Live	Norte de Santander	Blood	TE(R)	COIN14JPPX01.0224
246	2014	40 to 49 years	44	Male	Scattered rural	Antioquia	Apartadó	Subsidized	Others	Yes	Live	Antioquia	Blood	sensitive	COIN14JPPX01.0008
247	2014	40 to 49 years	45	Male	Municipal center	Norte de Santander	Cúcuta	Contributory	Others	Yes	Live	Norte de Santander	Blood	sensitive	COIN14JPPX01.0115
248	2014	40 to 49 years	45	Male	Municipal center	Meta	Villavicencio	Contributory	Others	Yes	Live	Meta	Blood	sensitive	COIN14JPPX01.0062
249	2014	40 to 49 years	49	Female	Municipal center	Norte de Santander	Cúcuta	Contributory	Others	Yes	Live	Norte de Santander	Blood	sensitive	COIN14JPPX01.0115
250	2014	>50 years	50	Male	Scattered rural	Antioquia	Apartadó	Contributory	Raizal	No	Live	Antioquia	Blood	sensitive	COIN14JPPX01.0008
251	2014	>50 years	50	Male	Scattered rural	Antioquia	Apartadó	Subsidized	Others	Yes	Live	Antioquia	Blood	sensitive	COIN14JPPX01.0008
252	2014	>50 years	52	Female	Scattered rural	Antioquia	Apartadó	Subsidized	Others	Yes	Live	Antioquia	Blood	sensitive	COIN14JPPX01.0008
253	2014	>50 years	54	Male	Municipal center	Risaralda	Pereira	Contributory	Others	Yes	Live	Risaralda	Blood	sensitive	COIN14JPPX01.0208
254	2014	>50 years	55	Female	Populated Center	Antioquia	Apartadó	Contributory	Others	Yes	Live	Antioquia	Blood	sensitive	COIN14JPPX01.0008
255	2015	<1 year	0.66	Female	Municipal center	Huila	Neiva	Contributory	Others	Yes	Live	Huila	Stool	NAL(R)-CIP(I)	COIN15JPPX01.0006
256	2015	1 to 9 years	1	Female	Scattered rural	Antioquia	Apartadó	Subsidized	Others	Yes	Live	Antioquia	Blood	sensitive	COIN15JPPX01.0008
257	2015	1 to 9 years	2	Female	Municipal center	Norte de Santander	Cúcuta	Contributory	Others	Yes	Live	Norte de Santander	Stool	sensitive	COIN15JPPX01.0083
258	2015	1 to 9 years	2	Male	Scattered rural	Nariño	Roberto Payán	Subsidized	Others	Yes	Live	Nariño	Blood	AMP(I)-CIP(I)	COIN15JPPX01.0008
259	2015	1 to 9 years	3	Female	Scattered rural	Meta	Fuente de Oro	Contributory	Others	Yes	Live	Meta	Blood	sensitive	COIN15JPPX01.0032
260	2015	1 to 9 years	4	Male	Municipal center	Norte de Santander	Cúcuta	Subsidized	Others	Yes	Live	Norte de Santander	Blood	sensitive	COIN15JPPX01.0115
261	2015	1 to 9 years	4	Male	Populated Center	Nariño	Olaya Herrera	Subsidized	Others	Yes	Live	Nariño	Stool	NAL(I)-CIP(I)	COIN15JPPX01.0008
262	2015	1 to 9 years	5	Female	Municipal center	Meta	Granada	Contributory	Others	Yes	Live	Meta	Blood	NAL(R)	COIN15JPPX01.0032
263	2015	1 to 9 years	5	Female	Municipal center	Norte de Santander	Cúcuta	Contributory	Others	Yes	Live	Norte de Santander	Blood	sensitive	COIN15JPPX01.0115
264	2015	1 to 9 years	5	Male	Municipal center	Nariño	Barbacoas	Contributory	Others	Yes	Live	Nariño	Stool	sensitive	COIN15JPPX01.0008
265	2015	1 to 9 years	5	Male	Populated Center	Antioquia	Apartadó	Subsidized	Others	Yes	Live	Antioquia	Blood	AMP(R)	COIN15JPPX01.0183
266	2015	1 to 9 years	6	Female	Municipal center	Nariño	Barbacoas	Subsidized	Others	Yes	Death	Nariño	Blood	sensitive	COIN15JPPX01.0009
267	2015	1 to 9 years	6	Female	Municipal center	Norte de Santander	Villa del Rosario	Subsidized	Others	Yes	Live	Norte de Santander	Blood	sensitive	COIN15JPPX01.0115
268	2015	1 to 9 years	6	Male	Municipal center	Antioquia	Turbo	Subsidized	Others	Yes	Live	Antioquia	Blood	sensitive	COIN15JPPX01.0064
269	2015	1 to 9 years	7	Female	Populated Center	Norte de Santander	Tibú	Subsidized	Others	Yes	Live	Norte de Santander	Stool	sensitive	COIN15JPPX01.0083
270	2015	1 to 9 years	8	Male	Municipal center	Antioquia	Turbo	Exception	Afro-Colombian	No	Live	Antioquia	Blood	AMP(R)	COIN15JPPX01.0012
271	2015	1 to 9 years	8	Female	Municipal center	Antioquia	Turbo	Subsidized	Afro-Colombian	Yes	Live	Antioquia	NA	sensitive	COIN15JPPX01.0012
272	2015	1 to 9 years	8	Female	Municipal center	Bogotá, D.C.	Bogotá, D.C.	Especial	Others	Yes	Live	Bogotá	Stool	sensitive	COIN15JPPX01.0095
273	2015	1 to 9 years	8	Male	Municipal center	Norte de Santander	Los Patios	Subsidized	Others	Yes	Live	Norte de Santander	Blood	AMP(R)	COIN15JPPX01.0115
274	2015	1 to 9 years	8	Male	Scattered rural	Antioquia	Apartadó	Contributory	Others	Yes	Live	Antioquia	Blood	sensitive	COIN15JPPX01.0008
275	2015	1 to 9 years	8	Male	Scattered rural	Antioquia	Apartadó	Subsidized	Others	Yes	Live	Antioquia	Blood	sensitive	COIN15JPPX01.0112
276	2015	1 to 9 years	9	Male	Municipal center	Antioquia	Turbo	Subsidized	Afro-Colombian	Yes	Live	Antioquia	Blood	NAL(R)	COIN15JPPX01.0019
277	2015	1 to 9 years	9	Male	Scattered rural	Antioquia	Apartadó	Subsidized	Others	Yes	Live	Antioquia	Blood	AMP(R)	COIN15JPPX01.0008
278	2015	10 to 19 years	10	Female	Municipal center	Antioquia	Turbo	Subsidized	Afro-Colombian	No	Live	Antioquia	Blood	AMP(R)	COIN15JPPX01.0019
279	2015	10 to 19 years	10	Female	Municipal center	Antioquia		Contributory	Others	Yes	Live	Antioquia	Blood	sensitive	COIN15JPPX01.0012
280	2015	10 to 19 years	10	Female	Municipal center	Norte de Santander	Cúcuta	Contributory	Others	Yes	Live	Norte de Santander	Blood	sensitive	COIN15JPPX01.0115
281	2015	10 to 19 years	10	Male	Municipal center	Norte de Santander	Cúcuta	Contributory	Others	Yes	Live	Norte de Santander	Blood	sensitive	COIN15JPPX01.0083
282	2015	10 to 19 years	10	Male	Municipal center	Norte de Santander	Cúcuta	Subsidized	Others	Yes	Live	Norte de Santander	Blood	sensitive	COIN15JPPX01.0083
283	2015	10 to 19 years	10	Male	Municipal center	Nariño	San Andres de Tumaco	Subsidized	Others	Yes	Live	Nariño	Bone marrow	NAL(I)-CIP(I)	COIN15JPPX01.0008
284	2015	10 to 19 years	10	Male	Populated Center	Antioquia	Turbo	Contributory	Others	Yes	Live	Antioquia	Blood	sensitive	COIN15JPPX01.0165
285	2015	10 to 19 years	11	Male	Municipal center	Antioquia	Turbo	Especial	Afro-Colombian	Yes	Live	Antioquia	Blood	sensitive	COIN15JPPX01.0019
286	2015	10 to 19 years	11	Female	Municipal center	Valle del Cauca	Cali	Subsidized	Afro-Colombian	Yes	Live	Valle del Cauca	Blood	sensitive	COIN15JPPX01.0013
287	2015	10 to 19 years	11	Male	Municipal center	Norte de Santander	Cúcuta	Contributory	Others	Yes	Live	Norte de Santander	Blood	AMP(I)	COIN15JPPX01.0110
288	2015	10 to 19 years	11	Male	Municipal center	Antioquia	Turbo	Subsidized	Others	Yes	Live	Antioquia	Blood	sensitive	COIN15JPPX01.0019
289	2015	10 to 19 years	12	Female	Municipal center	Antioquia	Turbo	Subsidized	Afro-Colombian	Yes	Live	Antioquia	Blood	sensitive	COIN15JPPX01.0012
290	2015	10 to 19 years	12	Male	Municipal center	Antioquia	Turbo	Subsidized	Afro-Colombian	Yes	Live	Antioquia	Blood	sensitive	COIN15JPPX01.0012
291	2015	10 to 19 years	12	Male	Municipal center	Bolívar	Cartagena	Contributory	Others	Yes	Live	Bolivar	Blood	sensitive	COIN15JPPX01.0008
292	2015	10 to 19 years	12	Female	Populated Center	Antioquia	Apartadó	Subsidized	Others	Yes	Live	Antioquia	Blood	sensitive	COIN15JPPX01.0012
293	2015	10 to 19 years	12	Male	Populated Center	Norte de Santander	Cúcuta	Subsidized	Others	Yes	Live	Norte de Santander	Blood	sensitive	COIN15JPPX01.0114
294	2015	10 to 19 years	12	Female	Scattered rural	Antioquia	Apartadó	Contributory	Others	Yes	Live	Antioquia	Blood	sensitive	COIN15JPPX01.0012
295	2015	10 to 19 years	13	Male	Municipal center	Norte de Santander	Los Patios	Subsidized	Others	Yes	Live	Norte de Santander	Blood	sensitive	COIN15JPPX01.0115
296	2015	10 to 19 years	13	Male	Municipal center	Antioquia	Turbo	Subsidized	Others	Yes	Live	Antioquia	Blood	sensitive	COIN15JPPX01.0012
297	2015	10 to 19 years	13	Male	Scattered rural	Nariño	Roberto Payán	Subsidized	Others	Yes	Live	Nariño	Blood	NAL(I)-CIP(I)	COIN15JPPX01.0008
298	2015	10 to 19 years	14	Female	Municipal center	Antioquia	Apartadó	Contributory	Others	Yes	Live	Antioquia	Blood	sensitive	COIN15JPPX01.0012
299	2015	10 to 19 years	14	Male	Municipal center	Norte de Santander	El Zulia	No affiliation	Others	Yes	Live	Norte de Santander	Blood	sensitive	COIN15JPPX01.0115
300	2015	10 to 19 years	15	Male	Municipal center	Antioquia	Apartadó	Contributory	Others	Yes	Live	Antioquia	Blood	AMP(R)	COIN15JPPX01.0183
301	2015	10 to 19 years	15	Female	Populated Center	Norte de Santander	Cúcuta	Contributory	Others	Yes	Live	Norte de Santander	Blood	sensitive	COIN15JPPX01.0115
302	2015	10 to 19 years	15	Male	Scattered rural	Norte de Santander	Villa del Rosario	No affiliation	Others	Yes	Live	Norte de Santander	Blood	sensitive	COIN15JPPX01.0115
303	2015	10 to 19 years	16	Male	Municipal center	Valle del Cauca	Candelaria	Contributory	Afro-Colombian	Yes	Live	Valle del Cauca	Blood	sensitive	COIN15JPPX01.0184
304	2015	10 to 19 years	16	Female	Municipal center	Norte de Santander	Cúcuta	Contributory	Others	No	Live	Norte de Santander	Blood	sensitive	COIN15JPPX01.0115
305	2015	10 to 19 years	16	Female	Municipal center	Norte de Santander	Cúcuta	No affiliation	Others	Yes	Live	Norte de Santander	Blood	sensitive	COIN15JPPX01.0115
306	2015	10 to 19 years	16	Female	Municipal center	Antioquia	Apartadó	Subsidized	Others	Yes	Live	Antioquia	Blood	AMP(R)	COIN15JPPX01.0085
307	2015	10 to 19 years	17	Male	Municipal center	Meta	Granada	Subsidized	Others	Yes	Live	Meta	Blood	NAL(R)-CIP(I)	COIN15JPPX01.0032
308	2015	10 to 19 years	17	Male	Municipal center	Meta	Granada	Subsidized	Others	Yes	Live	Meta	Blood	sensitive	COIN15JPPX01.0032
309	2015	10 to 19 years	17	Female	Municipal center	Norte de Santander	Cúcuta	Subsidized	Others	Yes	Live	Norte de Santander	Stool	NAL(I)-CIP(I)	COIN15JPPX01.0083
310	2015	10 to 19 years	17	Male	Populated Center	Antioquia	Apartadó	Subsidized	Others	Yes	Live	Antioquia	Blood	sensitive	COIN15JPPX01.0183
311	2015	10 to 19 years	18	Male	Populated Center	Norte de Santander	Cúcuta	Subsidized	Others	Yes	Live	Norte de Santander	Blood	sensitive	COIN15JPPX01.0122
312	2015	10 to 19 years	18	Male	Scattered rural	Antioquia	Apartadó	Contributory	Others	Yes	Live	Antioquia	Blood	sensitive	COIN15JPPX01.0121
313	2015	10 to 19 years	19	Female	Municipal center	Norte de Santander	Cúcuta	Contributory	Others	Yes	Live	Norte de Santander	Blood	sensitive	COIN15JPPX01.0177
314	2015	10 to 19 years	19	Male	Municipal center	Norte de Santander	Villa del Rosario	Contributory	Others	Yes	Live	Norte de Santander	Blood	sensitive	COIN15JPPX01.0115
315	2015	10 to 19 years	19	Male	Municipal center	Norte de Santander	Cúcuta	Especial	Others	Yes	Live	Norte de Santander	Blood	sensitive	COIN15JPPX01.0115
316	2015	10 to 19 years	19	Male	Municipal center	Córdoba	Montería	Especial	Others	Yes	Live	Antioquia	Blood	SXT(R)-AMP(R)	COIN15JPPX01.0096
317	2015	10 to 19 years	19	Male	Municipal center	Antioquia	Turbo	Especial	Others	No	Live	Antioquia	Stool	sensitive	COIN15JPPX01.0089
318	2015	20 to 29 years	20	Male	Municipal center	Norte de Santander	Cúcuta	Contributory	Others	Yes	Live	Norte de Santander	Blood	AMP(R)-CTX (R)- CAZ(R)	COIN15JPPX01.0083
319	2015	20 to 29 years	20	Male	Scattered rural	Antioquia	Apartadó	Contributory	Others	Yes	Live	Antioquia	Blood	sensitive	COIN15JPPX01.0008
320	2015	20 to 29 years	21	Female	Municipal center	Nariño	Barbacoas	Subsidized	Afro-Colombian	Yes	Live	Nariño	Blood	sensitive	COIN15JPPX01.0008
321	2015	20 to 29 years	21	Female	Municipal center	Meta	Granada	Contributory	Others	Yes	Live	Meta	Blood	sensitive	COIN15JPPX01.0032
322	2015	20 to 29 years	21	Female	Municipal center	Norte de Santander	Cúcuta	Subsidized	Others	Yes	Live	Norte de Santander	Blood	sensitive	COIN15JPPX01.0115
323	2015	20 to 29 years	21	Female	Scattered rural	Nariño	Roberto Payán	Subsidized	Afro-Colombian	Yes	Live	Nariño	Blood	NAL(I)-AMP(R)	COIN15JPPX01.0008
324	2015	20 to 29 years	21	Female	Scattered rural	Antioquia	Apartadó	Subsidized	Others	Yes	Live	Antioquia	Blood	SXT(R)-AMP(R)	COIN15JPPX01.0090
325	2015	20 to 29 years	22	Male	Municipal center	Antioquia	Turbo	Contributory	Others	No	Live	Antioquia	Blood	sensitive	COIN15JPPX01.0063
326	2015	20 to 29 years	22	Female	Municipal center	Antioquia	Turbo	Especial	Others	No	Live	Antioquia	Blood	sensitive	COIN15JPPX01.0019
327	2015	20 to 29 years	22	Male	Municipal center	Norte de Santander	Cúcuta	Exception	Others	Yes	Live	Norte de Santander	Blood	AMP(R)	COIN15JPPX01.0186
328	2015	20 to 29 years	22	Female	Municipal center	Norte de Santander	Cúcuta	Subsidized	Others	Yes	Live	Norte de Santander	Blood	sensitive	COIN15JPPX01.0115
329	2015	20 to 29 years	22	Female	Scattered rural	Antioquia	Apartadó	Contributory	Others	Yes	Live	Antioquia	Blood	sensitive	COIN15JPPX01.0016
330	2015	20 to 29 years	23	Female	Municipal center	Norte de Santander	Cúcuta	Contributory	Others	Yes	Live	Norte de Santander	Blood	sensitive	COIN15JPPX01.0083
331	2015	20 to 29 years	23	Female	Municipal center	Norte de Santander	Cúcuta	Contributory	Others	Yes	Live	Norte de Santander	Blood	sensitive	COIN15JPPX01.0115
332	2015	20 to 29 years	23	Male	Municipal center	Norte de Santander	Cúcuta	Contributory	Others	Yes	Live	Norte de Santander	Blood	sensitive	COIN15JPPX01.0115
333	2015	20 to 29 years	23	Male	Municipal center	Norte de Santander	Cúcuta	Contributory	Others	Yes	Live	Norte de Santander	Blood	sensitive	COIN15JPPX01.0115
334	2015	20 to 29 years	23	Male	Municipal center	Norte de Santander	Cúcuta	No affiliation	Others	Yes	Live	Norte de Santander	Blood	AMP(R)	COIN15JPPX01.0171
335	2015	20 to 29 years	23	Female	Municipal center	Antioquia	Apartadó	Subsidized	Others	Yes	Live	Antioquia	Blood	sensitive	COIN15JPPX01.0012
336	2015	20 to 29 years	23	Male	Municipal center	Norte de Santander	Cúcuta	Subsidized	Others	Yes	Live	Norte de Santander	Blood	sensitive	COIN15JPPX01.0084
337	2015	20 to 29 years	23	Female	Scattered rural	Antioquia	Apartadó	Subsidized	Others	Yes	Live	Antioquia	Blood	sensitive	COIN15JPPX01.0008
338	2015	20 to 29 years	24	Male	Municipal center	Bolívar	Cartagena	Contributory	Afro-Colombian	Yes	Live	Bolivar	Blood	sensitive	COIN15JPPX01.0003
339	2015	20 to 29 years	24	Male	Municipal center	Norte de Santander	Cúcuta	Contributory	Others	Yes	Live	Norte de Santander	Blood	sensitive	COIN15JPPX01.0115
340	2015	20 to 29 years	25	Female	Municipal center	Valle del Cauca	Cali	Contributory	Others	No	Live	Valle del Cauca	Blood	NAL(R)-CIP(I)	COIN15JPPX01.0120
341	2015	20 to 29 years	25	Female	Municipal center	Norte de Santander	Cúcuta	Exception	Others	Yes	Live	Norte de Santander	Blood	sensitive	COIN15JPPX01.0115
342	2015	20 to 29 years	25	Female	Municipal center	Norte de Santander	Cúcuta	Subsidized	Others	Yes	Live	Norte de Santander	Blood	sensitive	COIN15JPPX01.0083
343	2015	20 to 29 years	26	Male	Municipal center	Antioquia		Contributory	Afro-Colombian	Yes	Live	Antioquia	Stool	sensitive	COIN15JPPX01.0019
344	2015	20 to 29 years	26	Female	Municipal center	Norte de Santander	Cúcuta	Contributory	Others	Yes	Live	Norte de Santander	Blood	sensitive	COIN15JPPX01.0115
345	2015	20 to 29 years	26	Male	Municipal center	Norte de Santander	Cúcuta	Contributory	Others	Yes	Live	Norte de Santander	Blood	sensitive	COIN15JPPX01.0083
346	2015	20 to 29 years	26	Male	Municipal center	Norte de Santander	Cúcuta	Contributory	Others	Yes	Live	Norte de Santander	Blood	AMP(R)	COIN15JPPX01.0083
347	2015	20 to 29 years	26	Male	Municipal center	Norte de Santander	Cúcuta	No affiliation	Others	Yes	Live	Norte de Santander	Blood	sensitive	COIN15JPPX01.0115
348	2015	20 to 29 years	26	Male	Scattered rural	Antioquia	Apartadó	Subsidized	Others	Yes	Live	Antioquia	Blood	AMP(R)	COIN15JPPX01.0008
349	2015	20 to 29 years	27	Male	Municipal center	Meta	Villavicencio	Exception	Others	Yes	Live	Meta	Blood	sensitive	COIN15JPPX01.0032
350	2015	20 to 29 years	27	Female	Municipal center	Norte de Santander	Cúcuta	Subsidized	Others	No	Live	Norte de Santander	Blood	sensitive	COIN15JPPX01.0115
351	2015	20 to 29 years	27	Female	Scattered rural	Antioquia	Apartadó	Subsidized	Others	Yes	Live	Antioquia	Blood	sensitive	COIN15JPPX01.0008
352	2015	20 to 29 years	28	Female	Municipal center	Norte de Santander	Cúcuta	Contributory	Others	Yes	Live	Norte de Santander	Blood	AMP(R)	COIN15JPPX01.0005
353	2015	20 to 29 years	28	Female	Municipal center	Norte de Santander	Cúcuta	Subsidized	Others	Yes	Live	Norte de Santander	Blood	sensitive	COIN15JPPX01.0083
354	2015	20 to 29 years	29	Female	Municipal center	Antioquia	Turbo	Subsidized	Afro-Colombian	Yes	Live	Antioquia	Blood	sensitive	COIN15JPPX01.0012
355	2015	20 to 29 years	29	Female	Municipal center	Norte de Santander	Cúcuta	Contributory	Others	Yes	Live	Norte de Santander	Blood	AMP(I)	COIN15JPPX01.0115
356	2015	20 to 29 years	29	Female	Municipal center	Norte de Santander	Cúcuta	Contributory	Others	Yes	Live	Norte de Santander	Blood	sensitive	COIN15JPPX01.0115
357	2015	20 to 29 years	29	Male	Municipal center	Bogotá, D.C.	Bogotá, D.C.	Contributory	Others	Yes	Live	Bogotá	Blood	TE(R)	COIN15JPPX01.0156
358	2015	20 to 29 years	29	Male	Municipal center	Antioquia	Turbo	Exception	Others	Yes	Live	Antioquia	Blood	sensitive	COIN15JPPX01.0216
359	2015	30 to 39 years	30	Female	Municipal center	Antioquia	Turbo	Contributory	Afro-Colombian	Yes	Live	Antioquia	Blood	sensitive	COIN15JPPX01.0012
360	2015	30 to 39 years	30	Female	Municipal center	Norte de Santander	Los Patios	Contributory	Others	Yes	Live	Norte de Santander	Blood	sensitive	COIN15JPPX01.0115
361	2015	30 to 39 years	30	Female	Municipal center	Norte de Santander	Cúcuta	Contributory	Others	Yes	Live	Norte de Santander	Blood	sensitive	COIN15JPPX01.0115
362	2015	30 to 39 years	30	Female	Municipal center	Antioquia	Turbo	Contributory	Others	Yes	Live	Antioquia	Blood	sensitive	COIN15JPPX01.0019
363	2015	30 to 39 years	31	Male	Municipal center	Valle del Cauca	Cali	Contributory	Others	Yes	Live	Valle del Cauca	Blood	sensitive	COIN15JPPX01.0182
364	2015	30 to 39 years	31	Female	Municipal center	Norte de Santander	Cúcuta	Subsidized	Others	Yes	Death	Norte de Santander	Blood	sensitive	COIN15JPPX01.0115
365	2015	30 to 39 years	31	Female	Municipal center	Huila	Garzón	Subsidized	Others	Yes	Live	Huila	Blood	NAL(R)	COIN15JPPX01.0006
366	2015	30 to 39 years	31	Male	Municipal center	Bolívar	Cartagena	Subsidized	Others	Yes	Live	Bolivar	Blood	sensitive	COIN15JPPX01.0156
367	2015	30 to 39 years	32	Female	Municipal center	Norte de Santander	Cúcuta	Contributory	Others	Yes	Live	Norte de Santander	Blood	sensitive	COIN15JPPX01.0083
368	2015	30 to 39 years	32	Male	Municipal center	Norte de Santander	Cúcuta	Contributory	Others	Yes	Live	Norte de Santander	Blood	sensitive	COIN15JPPX01.0115
369	2015	30 to 39 years	32	Female	Municipal center	Antioquia	Carepa	Contributory	Others	Yes	Live	Antioquia	Stool	sensitive	COIN15JPPX01.0092
370	2015	30 to 39 years	32	Female	Scattered rural	Norte de Santander	Cúcuta	Subsidized	Others	Yes	Live	Norte de Santander	Blood	sensitive	COIN15JPPX01.0115
371	2015	30 to 39 years	33	Male	Municipal center	Norte de Santander	Cúcuta	Contributory	Others	Yes	Live	Norte de Santander	Blood	sensitive	COIN15JPPX01.0115
372	2015	30 to 39 years	33	Male	Municipal center	Nariño	Pasto	No affiliation	Others	Yes	Live	Antioquia	Blood-Stool	sensitive	COIN15JPPX01.0008
373	2015	30 to 39 years	33	Male	Scattered rural	Nariño	Policarpa	Subsidized	Others	Yes	Live	Nariño	Blood	sensitive	COIN15JPPX01.0012
374	2015	30 to 39 years	34	Male	Municipal center	Huila	Tarqui	Subsidized	Others	Yes	Live	Huila	Blood	sensitive	COIN15JPPX01.0031
375	2015	30 to 39 years	35	Male	Municipal center	Norte de Santander	Cúcuta	Contributory	Others	Yes	Live	Norte de Santander	Blood	sensitive	COIN15JPPX01.0115
376	2015	30 to 39 years	35	Male	Municipal center	Meta	Villavicencio	Contributory	Others	Yes	Live	Meta	Stool	SXT(R)	COIN15JPPX01.0032
377	2015	30 to 39 years	35	Male	Municipal center	Valle del Cauca	Cali	Especial	Others	Yes	Live	Valle del Cauca	Blood	sensitive	COIN15JPPX01.0222
378	2015	30 to 39 years	36	Female	Municipal center	Norte de Santander	Cúcuta	Contributory	Others	Yes	Live	Norte de Santander	Blood	AMP(R)	COIN15JPPX01.0083
379	2015	30 to 39 years	36	Female	Municipal center	Antioquia	Apartadó	Contributory	Others	Yes	Live	Antioquia	Blood	AMP(I)	COIN15JPPX01.0008
380	2015	30 to 39 years	38	Female	Municipal center	Norte de Santander	Cúcuta	Contributory	Others	Yes	Live	Norte de Santander	Blood	SXT(R)	COIN15JPPX01.0115
381	2015	30 to 39 years	39	Female	Municipal center	Norte de Santander	Cúcuta	Contributory	Others	Yes	Live	Norte de Santander	Blood	sensitive	COIN15JPPX01.0115
382	2015	30 to 39 years	39	Male	Municipal center	Huila	Garzón	No affiliation	Others	Yes	Live	Huila	Blood	NAL(R)	COIN15JPPX01.0006
383	2015	30 to 39 years	39	Female	Municipal center	Norte de Santander	Villa del Rosario	Subsidized	Others	Yes	Live	Norte de Santander	Blood	TE(R)-C(R)	COIN15JPPX01.0115
384	2015	30 to 39 years	39	Male	Municipal center	Cesar	Valledupar	Subsidized	Others	Yes	Live	Cesar	Blood	sensitive	COIN15JPPX01.0183
385	2015	40 to 49 years	41	Male	Municipal center	Norte de Santander	Cúcuta	Contributory	Others	Yes	Live	Norte de Santander	Blood	sensitive	COIN15JPPX01.0083
386	2015	40 to 49 years	43	Female	Municipal center	Norte de Santander	Cúcuta	Contributory	Others	Yes	Live	Norte de Santander	Blood	AMP(R)	COIN15JPPX01.0115
387	2015	40 to 49 years	43	Female	Municipal center	Antioquia	Medellín	No affiliation	Others	Yes	Live	Antioquia	Blood	sensitive	COIN15JPPX01.0019
388	2015	40 to 49 years	46	Male	Municipal center	Norte de Santander	Cúcuta	Contributory	Others	No	Live	Norte de Santander	Blood	sensitive	COIN15JPPX01.0083
389	2015	40 to 49 years	46	Male	Municipal center	Norte de Santander	Cúcuta	Contributory	Others	Yes	Live	Norte de Santander	Blood	AMP(R)-SXT(R)	COIN15JPPX01.0115
390	2015	40 to 49 years	47	Female	Municipal center	Norte de Santander	Cúcuta	Contributory	Others	Yes	Live	Norte de Santander	Stool	AMP(R)	COIN15JPPX01.0115
391	2015	>50 years	50	Male	Municipal center	Bogotá, D.C.	Bogotá, D.C.	Contributory	Others	No	Live	Bogotá	Blood	AMP(R)	COIN15JPPX01.0058
392	2015	>50 years	50	Male	Municipal center	Bogotá, D.C.	Bogotá, D.C.	Subsidized	Others	Yes	Live	Bogotá	Blood	sensitive	COIN15JPPX01.0227
393	2015	>50 years	52	Male	Populated Center	Risaralda	Pereira	Contributory	Others	Yes	Live	Risaralda	Stool	TE(R)-C(R)-NAL (I)-CIP (I)	COIN15JPPX01.0193
394	2015	>50 years	53	Female	Municipal center	Nariño	San Andres de Tumaco	Subsidized	Afro-Colombian	Yes	Live	Nariño	Blood	sensitive	COIN15JPPX01.0008
395	2015	>50 years	54	Male	Municipal center	Norte de Santander	Cúcuta	Contributory	Others	Yes	Live	Norte de Santander	Blood	sensitive	COIN15JPPX01.0224
396	2015	>50 years	54	Male	Municipal center	Norte de Santander	Cúcuta	Exception	Others	Yes	Live	Norte de Santander	Blood	AMP(I)	COIN15JPPX01.0115
397	2015	>50 years	56	Female	Municipal center	Norte de Santander	Cúcuta	Contributory	Others	No	Live	Norte de Santander	Blood	AMP(R)	COIN15JPPX01.0124
398	2015	>50 years	57	Female	Municipal center	Bolívar	Cartagena	Contributory	Others	Yes	Live	Bolivar	Blood	sensitive	COIN15JPPX01.0115
399	2015	>50 years	59	Female	Municipal center	Norte de Santander	Cúcuta	Contributory	Others	Yes	Live	Norte de Santander	Blood	sensitive	COIN15JPPX01.0115
400	2015	>50 years	62	Female	Scattered rural	Santander	Vélez	Subsidized	Others	Yes	Live	Santander	Blood	sensitive	COIN15JPPX01.0109
401	2015	>50 years	67	Male	Scattered rural	Meta	El Castillo	Contributory	Others	Yes	Live	Meta	Blood	AMP(R)	COIN15JPPX01.0032
402	2015	>50 years	68	Male	Municipal center	Norte de Santander	Cúcuta	Subsidized	Others	Yes	Live	Norte de Santander	Blood	sensitive	COIN15JPPX01.0135
